# Supplementary material for: Preferences and uptake of home-based HIV self-testing for maternal retesting in Kenya
Source: PubMed Central journal article supplement (PMC10996825; doi:10.1101/2024.03.28.24305050), 2024-03-30

## Supplementary Tables and Figures

Table A. Correlates of selecting HB-HIVST as a retesting strategy at enrollment (vs. CB-RDT) (N=994)

|                                               | n (%) or median (IQR)         |            |                             |            | Prevalence Ratio (95% CI) |        |                  |        |
|-----------------------------------------------|-------------------------------|------------|-----------------------------|------------|---------------------------|--------|------------------|--------|
|                                               | HB-HIVST <sup>b</sup> (N=330) |            | CB-RDT <sup>c</sup> (N=664) |            | Crude                     | p      | Adjusted         | p      |
| Western Kenya                                 | 330                           | 168 (51)   | 664                         | 366 (55)   | 0.89 (0.72-1.10)          | 0.29   | 1.03 (0.70-1.52) | 0.89   |
| Age (year)                                    | 330                           | 23 (21-27) | 664                         | 24 (21-27) | 0.99 (0.97-1.01)          | 0.39   | 0.97 (0.94-1.00) | 0.08   |
| Gestational age ≥24 weeks at enrollment       | 330                           | 233 (71)   | 664                         | 491 (74)   | 0.99 (0.97-1.01)          | 0.39   |                  |        |
| Completed secondary education                 | 330                           | 185 (56)   | 664                         | 325 (49)   | 1.21 (1.01-1.45)          | 0.04*  | 1.38 (1.04-1.85) | 0.03*  |
| Employed                                      | 330                           | 104 (32)   | 664                         | 231 (35)   | 0.91 (0.75-1.10)          | 0.31   |                  |        |
| Household income ≥10,000 (KSH) per month      | 295                           | 125 (42)   | 581                         | 193 (33)   | 1.29 (1.06-1.58)          | 0.01*  | 1.43 (1.02-2.01) | 0.04*  |
| Depression <sup>a</sup>                       | 330                           | 166 (50)   | 664                         | 381 (57)   | 0.83 (0.69-1.00)          | 0.05*  | 0.79 (0.56-1.12) | 0.18   |
| Have live births                              | 330                           | 172 (52)   | 664                         | 375 (56)   | 0.89 (0.75-1.06)          | 0.19   |                  |        |
| Current pregnancy intended                    | 328                           | 196 (60)   | 663                         | 386 (58)   | 1.04 (0.85-1.27)          | 0.68   |                  |        |
| Relationship                                  | 330                           |            | 664                         |            |                           |        |                  |        |
| Married <sup>b</sup>                          |                               | 284 (86)   |                             | 548 (83)   | ref                       | ref    |                  |        |
| No partner                                    |                               | 21 (6)     |                             | 46 (7)     | 0.92 (0.64-1.32)          | 0.65   |                  |        |
| Not married w partner                         |                               | 25 (8)     |                             | 70 (11)    | 0.77 (0.54-1.09)          | 0.14   |                  |        |
| Low partnership power <sup>c</sup>            | 297                           | 79 (27)    | 598                         | 147 (25)   | 1.07 (0.87-1.33)          | 0.52   |                  |        |
| Ever tested with STI                          | 326                           | 5 (2)      | 662                         | 22 (3)     | 0.55 (0.25-1.24)          | 0.15   |                  |        |
| Polygamous <sup>+</sup>                       | 309                           | 8 (3)      | 616                         | 46 (7)     | 0.43 (0.22-0.82)          | 0.01*  |                  |        |
| Traveling time to clinic ≥1 hour <sup>i</sup> | 330                           | 83 (25)    | 663                         | 125 (19)   | 1.27 (1.03-1.57)          | 0.03*  | 1.39 (0.94-2.06) | 0.1    |
| Using transportation to clinic <sup>d</sup>   | 329                           | 223 (68)   | 663                         | 473 (71)   | 0.89 (0.74-1.09)          | 0.26   |                  |        |
| Waiting time ≥1 hour at clinic <sup>d</sup>   | 330                           | 128 (39)   | 663                         | 206 (31)   | 1.25 (1.05-1.49)          | 0.01*  | 1.27 (0.91-1.79) | 0.16   |
| Ever left clinic because of long wait         | 329                           | 46 (14)    | 664                         | 79 (12)    | 1.13 (0.88-1.44)          | 0.33   |                  |        |
| Schedule not working with clinic hours        | 330                           | 56 (17)    | 664                         | 67 (10)    | 1.45 (1.16-1.81)          | <0.01* | 2.26 (1.44-3.57) | <0.01* |

Interquartile range (IQR); home-based self-testing (HB-HIVST); clinic-based testing (CB-RDT); prevalence ratio (PR); confidence interval (CI). a. score of >10 on Edinburgh Postnatal Depression Scale (EDPS); b. married / cohabitating (vs. no partner); c. score in lowest quantile (<2.15) on Sexual Relationship Power Scale (SRPS); d. at last clinic visit before enrollment

\* p<0.05; \*\* Includes as interaction term with preterm birth. Kenya Shilling (KSH) ~ \$1 USD.

+. Polygamy was excluded in the adjusted model due to missing data

Table B. Correlates of completing HIV retesting with HB-HIVST (vs. CB-RDT) among women who selected HB-HIVST at enrollment (N=295)<sup>#</sup>

|                                                      | Retested with HB-HIVST (N=121) |            | Retested with CB-RDT (N=174) |            | Crude PR (95% CI) | p       |
|------------------------------------------------------|--------------------------------|------------|------------------------------|------------|-------------------|---------|
|                                                      | N, median (IQR) or n (%)       |            |                              |            |                   |         |
| Western Kenya                                        | 121                            | 47 (39)    | 174                          | 91 (52)    | 0.71 (0.53-0.95)  | 0.02*   |
| Age (years)                                          | 121                            | 24 (22-27) | 174                          | 23 (21-27) | 1.01 (0.99-1.04)  | 0.31    |
| Gestational age ≥24 weeks at enrollment              | 121                            | 86 (72)    | 174                          | 129 (74)   | 0.94 (0.69-1.28)  | 0.70    |
| Preterm birth (<37 weeks gestation age at delivery)  | 120                            | 27 (22)    | 174                          | 70 (40)    | 0.83 (0.35-1.94)  | 0.67    |
| Tested in pregnancy                                  |                                |            |                              |            | 0.29 (0.15-0.57)  | <0.001* |
| Tested in postpartum                                 |                                |            |                              |            |                   |         |
| Tested during postpartum (ref: pregnancy/delivery)   | 120                            | 84 (70)    | 174                          | 99 (57)    | **                | **      |
| Completed secondary education                        | 121                            | 67 (55)    | 174                          | 102 (59)   | 0.91 (0.69-1.20)  | 0.51    |
| Employed                                             | 121                            | 41 (34)    | 174                          | 56 (32)    | 1.06 (0.79-1.42)  | 0.70    |
| Household income ≥10,000 (KSH) per month             | 107                            | 56 (52)    | 158                          | 62 (39)    | 1.40 (1.04-1.87)  | 0.03*   |
| Depression <sup>a</sup>                              | 121                            | 47 (39)    | 174                          | 97 (56)    | 0.64 (0.48-0.86)  | <0.001* |
| Have live births                                     | 121                            | 73 (60)    | 174                          | 88 (51)    | 1.25 (0.94-1.66)  | 0.13    |
| Current pregnancy intended                           | 121                            | 74 (61)    | 172                          | 103 (60)   | 1.02 (0.78-1.32)  | 0.89    |
| Married/cohabitating <sup>b</sup>                    | 121                            | 109 (91)   | 174                          | 148 (85)   | 1.47 (0.88-2.44)  | 0.14    |
| Relationship duration <1 year <sup>b</sup>           | 116                            | 10 (9)     | 162                          | 22 (14)    | 0.73 (0.44-1.21)  | 0.22    |
| Low partnership power <sup>c</sup>                   | 117                            | 31 (26)    | 161                          | 43 (27)    | 1.02 (0.74-1.40)  | 0.92    |
| Traveling time to clinic ≥1 hour <sup>d</sup>        | 121                            | 27 (22)    | 174                          | 49 (28)    | 0.84 (0.6-1.16)   | 0.29    |
| Using transportation to clinic <sup>d</sup>          | 120                            | 75 (62)    | 174                          | 122 (70)   | 0.81 (0.61-1.07)  | 0.14    |
| Waiting time ≥1 hour at clinic <sup>d</sup>          | 121                            | 51 (42)    | 174                          | 64 (37)    | 1.16 (0.88-1.53)  | 0.30    |
| Ever left clinic because of long wait                | 121                            | 21 (17)    | 174                          | 20 (12)    | 1.31 (0.92-1.87)  | 0.14    |
| Schedule not working with clinic hours               | 121                            | 19 (16)    | 174                          | 27 (16)    | 1.02 (0.69-1.49)  | 0.93    |
| Partner tested for HIV during follow-up <sup>e</sup> | 115                            | 84 (73)    | 155                          | 82 (53)    | 1.70 (1.22-2.36)  | <0.001* |

Home-based self-testing (HB-HIVST); clinic-based testing (CB-RDT); Interquartile range (IQR); prevalence ratio (PR); confidence interval (CI); a. assessed by Edinburgh Postnatal Depression Scale (EDPS) with a score of >10; b. married / cohabitating (vs. no partner); c. score in lowest tertile (<2.15) on Sexual Relationship Power Scale (SRPS); d. assessed with the last clinic visit before enrollment; e. among women who had an HIV-negative or unknown partner and reported partner testing status during follow-up. Kenya Shilling (KSH) ~ \$1 USD.

\* p<0.05; \*\* Includes as interaction term with preterm birth

Table C. Correlates of completing HIV retesting with HB-HIVST (vs. CB-RDT) by 14 weeks postpartum among women who completed retesting with a follow-up visit within 3 months of the estimated 14 weeks postpartum date (N=813)

|                                                      | Crude PR (95% CI) | p-value | Adjusted PR (95% CI) | p-value |
|------------------------------------------------------|-------------------|---------|----------------------|---------|
| Western Kenya site (vs Nairobi site)                 | 0.70 (0.49-0.99)  | 0.04*   | 1.13 (0.64-2.02)     | 0.67    |
| Age (years)                                          | 1.02 (0.99-1.06)  | 0.15    | 1.02 (0.97-1.07)     | 0.51    |
| Gestational age ≥24 weeks at enrollment              | 0.90 (0.64-1.27)  | 0.56    |                      |         |
| Secondary education completed                        | 1.12 (0.80-1.57)  | 0.50    |                      |         |
| Employed                                             | 1.21 (0.86-1.69)  | 0.27    |                      |         |
| Household income ≥10,000 (KSH) per month             | 1.72 (1.21-2.44)  | <0.01*  | 1.57 (0.99-2.49)     | 0.05    |
| Tested during postpartum (ref: pregnancy)            | 1.16 (0.81-1.66)  | 0.41    | **                   | **      |
| Preterm birth (<37 weeks gestation age at delivery)  | 0.58 (0.38-0.87)  | 0.01*   |                      |         |
| Tested in pregnancy                                  |                   |         | 0.96 (0.37-2.49)     | 0.94    |
| Tested in postpartum                                 |                   |         | 0.32 (0.17-0.60)     | <0.001* |
| Depression <sup>a</sup>                              | 0.51 (0.36-0.72)  | <0.01*  | 0.40 (0.24-0.67)     | <0.001* |
| Have live births                                     | 1.09 (0.78-1.52)  | 0.61    |                      |         |
| Current pregnancy intended                           | 0.99 (0.70-1.38)  | 0.93    |                      |         |
| Married/cohabitating <sup>b</sup>                    | 1.68 (0.96-2.95)  | 0.07    | 1.53 (0.58-4.03)     | 0.39    |
| Relationship duration <1 year                        | 0.63 (0.33-1.21)  | 0.17    |                      |         |
| Low partnership power <sup>c</sup>                   | 1.06 (0.72-1.56)  | 0.77    |                      |         |
| Ever diagnosed with STI                              | 0.36 (0.05-2.42)  | 0.29    |                      |         |
| Traveling time to clinic ≥1 hour <sup>d</sup>        | 0.83 (0.54-1.28)  | 0.40    |                      |         |
| Used transportation to travel to clinic <sup>d</sup> | 0.75 (0.53-1.06)  | 0.11    |                      |         |
| Waiting time ≥1 at clinic <sup>d</sup>               | 1.37 (0.99-1.92)  | 0.06    | 1.31 (0.84-2.05)     | 0.23    |
| Ever left clinic because of long wait                | 1.48 (0.97-2.25)  | 0.07    | 1.56 (0.84-2.87)     | 0.16    |
| Schedule not working with clinic hours               | 1.45 (0.92-2.28)  | 0.11    |                      |         |
| Partner tested for HIV during follow-up <sup>e</sup> | 2.96 (2.03-4.31)  | <0.01*  | 4.67 (2.71-8.04)     | <0.001* |

Prevalence ratio (PR); confidence interval (CI); a. assessed by Edinburgh Postnatal Depression Scale (EDPS) with a score of >10; b. married / cohabitating (vs. no partner); c. score in lowest quantile (<2.15) on Sexual Relationship Power Scale (SRPS); d. assessed with the last clinic visit before enrollment; e. among women who had an HIV-negative or unknown partner and reported partner testing status during follow-up. Kenya Shilling (KSH) ~ \$1 USD.

\* p<0.05; \*\* Included as interaction term with preterm birth

Figure A. Future test preference among women who completed follow-up within 3 months of the estimated 14-week postpartum date, by retesting type at follow-up (N=813). Questions were answered based on self-reported responses of “Strongly Agree” or “Agree”. \* p<0.05 by Chi-square test. Home-based HIV self-test (HB-HIVST); clinic-based rapid diagnostic test (CB-RDT).

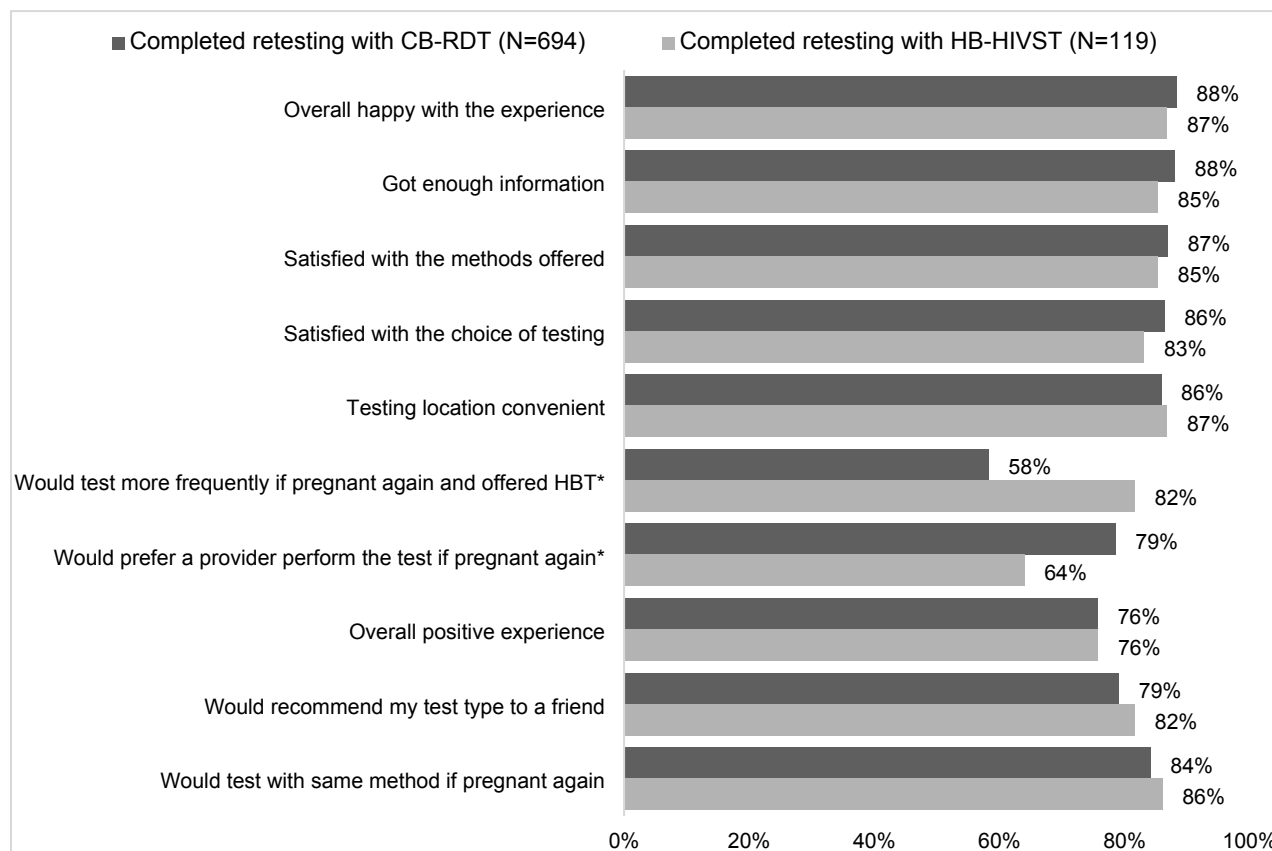

Supplement: NIHPP2024.03.28.24305050v1-supplement-1.pdf [file NIHPP2024.03.28.24305050v1-supplement-1.pdf]
